# Supplementary material for: The Spindle Checkpoint Functions of Mad3 and Mad2 Depend on a Mad3 KEN Box-mediated Interaction with Cdc20-Anaphase-promoting Complex (APC/C)
Source: PubMed Central journal article supplement — J Biol Chem. 2008 Aug 22;283(34):23039–47. doi: 10.1074/jbc.M803594200 (PMC2516979; doi:10.1074/jbc.m803594200), 2008-08-22
Supplement: supp_283_34_23039__1.pdf [file supp_283_34_23039__1.pdf]

## Matylda Sczaniecka

---

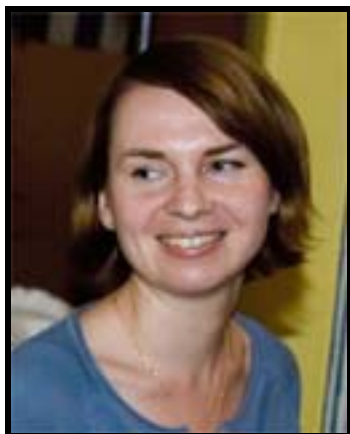

**Current Position:** Research Fellow,  
Royal (Dick) School of Veterinary Studies,  
University of Edinburgh

**Education:** Ph.D. in Cell Biology (2007)  
from the University of Edinburgh;  
M.Sc. in Food Technology (2002) from  
the Agricultural University of Poznan,  
Poland

The featured paper summarises the most interesting findings of my Ph.D. research, carried out in Kevin Hardwick's laboratory at the University of Edinburgh. During my Ph.D., I used fission yeast to study the mechanisms governing the inhibition of the Anaphase Promoting Complex/Cyclosome (APC/C) by the components of the spindle checkpoint at the metaphase to anaphase transition. My research focused mainly on the Mitotic Checkpoint Complex (MCC) and its biochemical interactions with the APC/C. I closely examined the Mad3 protein, which led to the discovery of a novel role of KEN boxes in APC inhibition. During my Ph.D., I became particularly interested in the ubiquitin-proteasome pathway, and I am currently working as a postdoctoral fellow at the Ubiquitination and Cell Signalling Group at the University of Edinburgh.

---

**Read Dr. Sczaniecka's article entitled:** The Spindle Checkpoint Functions of Mad3 and Mad2 Depend on a Mad3 KEN Box-mediated Interaction with Cdc20-Anaphase-promoting Complex (APC/C)

<http://www.jbc.org/cgi/content/full/283/34/23039>
